# Supplementary material for: Investigating increased admissions to neonatal intensive care in England between 1995 and 2006: data linkage study using Hospital Episode Statistics
Source: Springer Nature journal article supplement (doi:10.1186/s12874-016-0152-0), 2016-05-20
Supplement: MOESM1 [file 10160018]

## RESEARCH

## Additional file 1: Hospital Episode Statistics

Andrei S Morgan<sup>1\*</sup>, Neil Marlow<sup>1</sup>, Kate Costeloe<sup>2</sup> and Elizabeth S Draper<sup>3</sup>

\*Correspondence:

[andrei.morgan@ucl.ac.uk](mailto:andrei.morgan@ucl.ac.uk)<sup>1</sup>Institute for Womens' Health,  
UCL, 74 Huntley Street, London,  
UKFull list of author information is  
available at the end of the article

The variables shown in table 1 were provided by the NHS Health and Social Care Information Centre for use in the Admissions Validation Study.

Table 1: Hospital Episode Statistics (HES) variables available for data linkage

| Original HES<br>variable name | Data description <sup>a</sup>                                           | Availability |      |
|-------------------------------|-------------------------------------------------------------------------|--------------|------|
|                               |                                                                         | 1995         | 2006 |
| HESYEAR                       | [Financial] year of HES data collection                                 | ✓            | ✓    |
| study_id                      | Unique identification number for each row                               | ×            | ✓    |
| neodur                        | Age of baby (days) at admission                                         | ✓            | ✓    |
| dob                           | Date of birth (baby)                                                    | ✓            | ✓    |
| dob_cfl                       | Date of birth check flag                                                | ✓            | ✓    |
| ethnos                        | Ethnic category                                                         | ✓            | ✓    |
| newnhsno                      | NHS number                                                              | ×            | ×    |
| encrypted_hesid               | Encrypted HES identification number                                     | ×            | ✓    |
| homeadd                       | [Maternal] home post code                                               | ✓            | ✓    |
| sex                           | Sex                                                                     | ✓            | ✓    |
| admidate                      | Admission date                                                          | ✓            | ✓    |
| ADMI.CFL                      | Admission date check flag                                               | ✓            | ✓    |
| admimeth                      | Admission method                                                        | ✓            | ✓    |
| admisorc                      | Admission source                                                        | ✓            | ✓    |
| disdate                       | Discharge date                                                          | ✓            | ✓    |
| dis_cfl                       | Discharge date check flag                                               | ✓            | ✓    |
| disdest                       | Discharge destination                                                   | ✓            | ✓    |
| dismeth                       | Discharge method                                                        | ✓            | ✓    |
| classpat                      | Patient classification                                                  | ✓            | ✓    |
| resha                         | Strategic Health Authority of residence                                 | ✓            | ✓    |
| soal                          | Super Output Area - Lower                                               | ×            | ✓    |
| soam                          | Super Output Area - Middle                                              | ×            | ✓    |
| imd04c                        | Index of Multiple Deprivation (2004) - Crime Domain                     | ×            | ✓    |
| imd04ed                       | Index of Multiple Deprivation (2004) - Education Domain                 | ×            | ✓    |
| imd04hd                       | Index of Multiple Deprivation (2004) - Housing and Service Domain       | ×            | ✓    |
| imd04hs                       | Index of Multiple Deprivation (2004) - Health and Disability Domain     | ×            | ✓    |
| imd04i                        | Index of Multiple Deprivation (2004) - Income Domain                    | ×            | ✓    |
| imd04ia                       | Index of Multiple Deprivation (2004) - Income affecting Adults Domain   | ×            | ✓    |
| imd04ic                       | Index of Multiple Deprivation (2004) - Income affecting Children Domain | ×            | ✓    |
| imd04le                       | Index of Multiple Deprivation (2004) - Living Environment Domain        | ×            | ✓    |
| imd04rk                       | Index of Multiple Deprivation (2004) - Overall Rank                     | ×            | ✓    |
| RURURB_IND                    | Rural-urban indicator                                                   | ×            | ✓    |
| dobbaby_1                     | Date of Birth (baby tail 1)                                             | ✓            | ✓    |
| dobbaby_2                     | Date of Birth (baby tail 2)                                             | ×            | ×    |
| dobbaby_3                     | Date of Birth (baby tail 3)                                             | ×            | ×    |
| dobbaby_4                     | Date of Birth (baby tail 4)                                             | ×            | ×    |
| dobbaby_5                     | Date of Birth (baby tail 5)                                             | ×            | ×    |
| dobbaby_6                     | Date of Birth (baby tail 6)                                             | ×            | ×    |
| dobbaby_7                     | Date of Birth (baby tail 7)                                             | ×            | ×    |
| dobbaby_8                     | Date of Birth (baby tail 8)                                             | ×            | ×    |
| dobbaby_9                     | Date of Birth (baby tail 9)                                             | ×            | ×    |
| birordr_1                     | Birth order (baby tail 1)                                               | ✓            | ✓    |
| birordr_2                     | Birth order (baby tail 2)                                               | ×            | ×    |
| birordr_3                     | Birth order (baby tail 3)                                               | ×            | ×    |
| birordr_4                     | Birth order (baby tail 4)                                               | ×            | ×    |
| birordr_5                     | Birth order (baby tail 5)                                               | ×            | ×    |
| birordr_6                     | Birth order (baby tail 6)                                               | ×            | ×    |

Continued on next page. . .

Table 1: (Continued.) Variables from Hospital Episode Statistics (HES) available for data linkage with the EPICure cohorts of 1995 and 2006.

| Original HES<br>variable name | Data description <sup>a</sup>                    | Availability |      |
|-------------------------------|--------------------------------------------------|--------------|------|
|                               |                                                  | 1995         | 2006 |
| birordr_7                     | Birth order (baby tail 7)                        | ×            | ×    |
| birordr_8                     | Birth order (baby tail 8)                        | ×            | ×    |
| birordr_9                     | Birth order (baby tail 9)                        | ×            | ×    |
| birweit_1                     | Birth weight (baby tail 1)                       | ✓            | ✓    |
| birweit_2                     | Birth weight (baby tail 2)                       | ×            | ×    |
| birweit_3                     | Birth weight (baby tail 3)                       | ×            | ×    |
| birweit_4                     | Birth weight (baby tail 4)                       | ×            | ×    |
| birweit_5                     | Birth weight (baby tail 5)                       | ×            | ×    |
| birweit_6                     | Birth weight (baby tail 6)                       | ×            | ×    |
| birweit_7                     | Birth weight (baby tail 7)                       | ×            | ×    |
| birweit_8                     | Birth weight (baby tail 8)                       | ×            | ×    |
| birweit_9                     | Birth weight (baby tail 9)                       | ×            | ×    |
| delmeth_1                     | Delivery method (baby tail 1)                    | ✓            | ✓    |
| delmeth_2                     | Delivery method (baby tail 2)                    | ×            | ×    |
| delmeth_3                     | Delivery method (baby tail 3)                    | ×            | ×    |
| delmeth_4                     | Delivery method (baby tail 4)                    | ×            | ×    |
| delmeth_5                     | Delivery method (baby tail 5)                    | ×            | ×    |
| delmeth_6                     | Delivery method (baby tail 6)                    | ×            | ×    |
| delmeth_7                     | Delivery method (baby tail 7)                    | ×            | ×    |
| delmeth_8                     | Delivery method (baby tail 8)                    | ×            | ×    |
| delmeth_9                     | Delivery method (baby tail 9)                    | ×            | ×    |
| delplac_1                     | Delivery place (baby tail 1)                     | ✓            | ✓    |
| delplac_2                     | Delivery place (baby tail 2)                     | ×            | ×    |
| delplac_3                     | Delivery place (baby tail 3)                     | ×            | ×    |
| delplac_4                     | Delivery place (baby tail 4)                     | ×            | ×    |
| delplac_5                     | Delivery place (baby tail 5)                     | ×            | ×    |
| delplac_6                     | Delivery place (baby tail 6)                     | ×            | ×    |
| delplac_7                     | Delivery place (baby tail 7)                     | ×            | ×    |
| delplac_8                     | Delivery place (baby tail 8)                     | ×            | ×    |
| delplac_9                     | Delivery place (baby tail 9)                     | ×            | ×    |
| anasdate                      | First antenatal assessment date                  | ✓            | ✓    |
| anagest                       | First antenatal assessment gestation             | ✓            | ✓    |
| gestat_1                      | Gestational age at delivery (baby tail 1)        | ✓            | ✓    |
| gestat_2                      | Gestational age at delivery (baby tail 2)        | ×            | ×    |
| gestat_3                      | Gestational age at delivery (baby tail 3)        | ×            | ×    |
| gestat_4                      | Gestational age at delivery (baby tail 4)        | ×            | ×    |
| gestat_5                      | Gestational age at delivery (baby tail 5)        | ×            | ×    |
| gestat_6                      | Gestational age at delivery (baby tail 6)        | ×            | ×    |
| gestat_7                      | Gestational age at delivery (baby tail 7)        | ×            | ×    |
| gestat_8                      | Gestational age at delivery (baby tail 8)        | ×            | ×    |
| gestat_9                      | Gestational age at delivery (baby tail 9)        | ×            | ×    |
| birstat_1                     | Birth status (baby tail 1)                       | ✓            | ✓    |
| birstat_2                     | Birth status (baby tail 2)                       | ×            | ×    |
| birstat_3                     | Birth status (baby tail 3)                       | ×            | ×    |
| birstat_4                     | Birth status (baby tail 4)                       | ×            | ×    |
| birstat_5                     | Birth status (baby tail 5)                       | ×            | ×    |
| birstat_6                     | Birth status (baby tail 6)                       | ×            | ×    |
| birstat_7                     | Birth status (baby tail 7)                       | ×            | ×    |
| birstat_8                     | Birth status (baby tail 8)                       | ×            | ×    |
| birstat_9                     | Birth status (baby tail 9)                       | ×            | ×    |
| matage                        | Maternal age at delivery                         | ✓            | ✓    |
| motdob                        | Mother's date of birth                           | ✓            | ✓    |
| numbaby                       | Number of babies delivered (live and still born) | ✓            | ✓    |
| numpreg                       | Number of previous pregnancies                   | ✓            | ✓    |
| postdur                       | Postnatal stay duration                          | ✓            | ✓    |
| biresus_1                     | Resuscitation method (baby tail 1)               | ✓            | ✓    |
| biresus_2                     | Resuscitation method (baby tail 2)               | ×            | ×    |
| biresus_3                     | Resuscitation method (baby tail 3)               | ×            | ×    |
| biresus_4                     | Resuscitation method (baby tail 4)               | ×            | ×    |
| biresus_5                     | Resuscitation method (baby tail 5)               | ×            | ×    |
| biresus_6                     | Resuscitation method (baby tail 6)               | ×            | ×    |
| biresus_7                     | Resuscitation method (baby tail 7)               | ×            | ×    |
| biresus_8                     | Resuscitation method (baby tail 8)               | ×            | ×    |
| biresus_9                     | Resuscitation method (baby tail 9)               | ×            | ×    |
| sexbaby_1                     | Sex of baby (baby tail 1)                        | ✓            | ✓    |
| sexbaby_2                     | Sex of baby (baby tail 2)                        | ×            | ×    |
| sexbaby_3                     | Sex of baby (baby tail 3)                        | ×            | ×    |
| sexbaby_4                     | Sex of baby (baby tail 4)                        | ×            | ×    |
| sexbaby_5                     | Sex of baby (baby tail 5)                        | ×            | ×    |
| sexbaby_6                     | Sex of baby (baby tail 6)                        | ×            | ×    |
| sexbaby_7                     | Sex of baby (baby tail 7)                        | ×            | ×    |
| sexbaby_8                     | Sex of baby (baby tail 8)                        | ×            | ×    |
| sexbaby_9                     | Sex of baby (baby tail 9)                        | ×            | ×    |

Continued on next page...

Table 1: (Continued.) Variables from Hospital Episode Statistics (HES) available for data linkage with the EPICure cohorts of 1995 and 2006.

| Original HES variable name | Data description <sup>a</sup>   | Availability |      |
|----------------------------|---------------------------------|--------------|------|
|                            |                                 | 1995         | 2006 |
| neocare                    | Level of neonatal care provided | ×            | ✓    |
| well_baby_ind              | Well baby indicator flag        | ✓            | ✓    |
| epikey                     | Record identifier               | ✓            | ✓    |

Variables from Hospital Episode Statistics (HES) available for data linkage with the EPICure cohorts of 1995 and 2006.

Notes:

<sup>a</sup> Taken from the HES data dictionary [1] unless otherwise indicated.

#### Author details

<sup>1</sup>Institute for Womens' Health, UCL, 74 Huntley Street, London, UK. <sup>2</sup> Homerton Hospital, London, UK. <sup>3</sup> University of Leicester, Leicester, UK.

#### References

1. The NHS Information Centre for health and social care: Hospital Episode Statistics: Inpatient Data Dictionary. Health & Social Care Information Centre, ??? (2010)
