# Supplementary material for: Investigating increased admissions to neonatal intensive care in England between 1995 and 2006: data linkage study using Hospital Episode Statistics
Source: Springer Nature journal article supplement (doi:10.1186/s12874-016-0152-0), 2016-05-20
Supplement: MOESM4 [file 10160018]

RESEARCH

# Additional file 4: Supplementary tables

Andrei S Morgan<sup>1\*</sup>, Neil Marlow<sup>1</sup>, Kate Costeloe<sup>2</sup> and Elizabeth S Draper<sup>3</sup>

\*Correspondence:

[andrei.morgan@ucl.ac.uk](mailto:andrei.morgan@ucl.ac.uk)

<sup>1</sup>Institute for Womens' Health,  
UCL, 74 Huntley Street, London,  
UK

Full list of author information is  
available at the end of the article

|    |    |
|----|----|
|    | 1  |
| 2  | 2  |
| 3  | 3  |
| 4  | 4  |
| 5  | 5  |
| 6  | 6  |
| 7  | 7  |
| 8  | 8  |
| 9  | 9  |
| 10 | 10 |
| 11 | 11 |
| 12 | 12 |
| 13 | 13 |
| 14 | 14 |
| 15 | 15 |
| 16 | 16 |
| 17 | 17 |
| 18 | 18 |
| 19 | 19 |
| 20 | 20 |
| 21 | 21 |
| 22 | 22 |
| 23 | 23 |
| 24 | 24 |
| 25 | 25 |
| 26 | 26 |
| 27 | 27 |
| 28 | 28 |
| 29 | 29 |
| 30 | 30 |
| 31 | 31 |
| 32 | 32 |
| 33 | 33 |

Table S1: Spread of values amongst matching variables

| Variable                    | HES 1995       | EPICure     | HES 2006       | EPICure 2    |
|-----------------------------|----------------|-------------|----------------|--------------|
| Level                       | N (%)          | N (%)       | N (%)          | N (%)        |
| <b>Month of birth</b>       |                |             |                |              |
| Jan                         | 45804 (7.96)   | —           | 50192 (7.95)   | 231 (8.40)   |
| Feb                         | 43000 (7.47)   | —           | 46817 (7.41)   | 209 (7.60)   |
| Mar                         | 47591 (8.27)   | 56 (8.38)   | 51436 (8.15)   | 234 (8.51)   |
| Apr                         | 46631 (8.10)   | 66 (9.88)   | 50261 (7.96)   | 240 (8.73)   |
| May                         | 49634 (8.62)   | 66 (9.88)   | 54118 (8.57)   | 218 (7.93)   |
| Jun                         | 49524 (8.61)   | 76 (11.38)  | 53277 (8.44)   | 264 (9.60)   |
| Jul                         | 50048 (8.70)   | 62 (9.28)   | 54016 (8.55)   | 225 (8.18)   |
| Aug                         | 49236 (8.56)   | 65 (9.73)   | 55377 (8.77)   | 210 (7.64)   |
| Sep                         | 49224 (8.55)   | 55 (8.23)   | 55725 (8.83)   | 263 (9.56)   |
| Oct                         | 48975 (8.51)   | 69 (10.33)  | 56435 (8.94)   | 238 (8.65)   |
| Nov                         | 45475 (7.90)   | 66 (9.88)   | 52284 (8.28)   | 205 (7.45)   |
| Dec                         | 41560 (7.22)   | 87 (13.02)  | 47198 (7.48)   | 213 (7.75)   |
| Missing                     | 8807 (1.53)    | 0 (0.00)    | 4265 (0.68)    | 0 (0.00)     |
| <b>GA at birth (weeks)</b>  |                |             |                |              |
| <20                         | 0 (0.00)       | —           | 95 (0.02)      | 24 (0.87)    |
| 20                          | 28 (0.00)      | —           | 36 (0.01)      | 34 (1.24)    |
| 21                          | 44 (0.01)      | 2 (0.30)    | 66 (0.01)      | 66 (2.40)    |
| 22                          | 82 (0.01)      | 16 (2.40)   | 87 (0.01)      | 151 (5.49)   |
| 23                          | 156 (0.03)     | 115 (17.22) | 212 (0.03)     | 322 (11.71)  |
| 24                          | 369 (0.06)     | 244 (36.53) | 384 (0.06)     | 637 (23.16)  |
| 25                          | 398 (0.07)     | 291 (43.56) | 682 (0.11)     | 686 (24.95)  |
| 26-29                       | 2519 (0.44)    | —           | 6446 (1.02)    | 820 (29.82)  |
| 30-34                       | 10727 (1.86)   | —           | 7813 (1.24)    | 3 (0.11)     |
| 35-39                       | 173806 (30.20) | —           | 129294 (20.48) | 0 (0.00)     |
| 40+                         | 223374 (38.81) | —           | 150170 (23.78) | 0 (0.00)     |
| Missing                     | 164006 (28.50) | 0 (0.00)    | 336116 (53.23) | 7 (0.25)     |
| <b>Sex</b>                  |                |             |                |              |
| Female                      | 278267 (48.35) | 359 (53.74) | 307080 (48.63) | 1422 (51.71) |
| Male                        | 292844 (50.88) | 309 (46.26) | 321119 (50.86) | 1319 (47.96) |
| Indeterminate               | 1782 (0.31)    | —           | —              | —            |
| Missing                     | 2616 (0.45)    | 0 (0.00)    | 3202 (0.51)    | 9 (0.33)     |
| <b>Birth weight (g)</b>     |                |             |                |              |
| <500                        | 2634 (0.46)    | 27 (4.04)   | 520 (0.08)     | 455 (16.55)  |
| 500-999                     | 1896 (0.33)    | 638 (95.51) | 1904 (0.30)    | 2117 (76.98) |
| 1000-1499                   | 3455 (0.60)    | 3 (0.45)    | 2833 (0.45)    | 149 (5.42)   |
| 1500-1999                   | 6263 (1.09)    | 0 (0.00)    | 5913 (0.94)    | 3 (0.11)     |
| 2000-2499                   | 19528 (3.39)   | 0 (0.00)    | 17477 (2.77)   | 0 (0.00)     |
| 2500-2999                   | 72098 (12.53)  | —           | 59906 (9.49)   | —            |
| 3000-3499                   | 152613 (26.52) | —           | 121699 (19.27) | —            |
| 3500-3999                   | 119605 (20.78) | —           | 96202 (15.24)  | —            |
| 4000-4499                   | 38222 (6.64)   | —           | 31414 (4.98)   | —            |
| 4500-4999                   | 5860 (1.02)    | —           | 4944 (0.78)    | —            |
| 5000+                       | 694 (0.12)     | —           | 622 (0.10)     | —            |
| Missing                     | 152641 (26.52) | 0 (0.00)    | 287967 (45.61) | 26 (0.95)    |
| <b>Birth order</b>          |                |             |                |              |
| 1                           | 318895 (55.41) | 562 (84.13) | 401473 (63.58) | 2428 (88.29) |
| >1                          | 5896 (1.02)    | 106 (15.87) | 5338 (0.85)    | 322 (11.71)  |
| Missing                     | 250718 (43.56) | 0 (0.00)    | 224590 (35.57) | 0 (0.00)     |
| <b>Maternal age (years)</b> |                |             |                |              |
| <16                         | 940 (0.16)     | 3 (0.45)    | 682 (0.11)     | 12 (0.44)    |
| 16-19                       | 21343 (3.71)   | 49 (7.34)   | 23494 (3.72)   | 219 (7.96)   |
| 20-29                       | 190184 (33.05) | 326 (48.80) | 162499 (25.74) | 1260 (45.82) |
| 30-39                       | 138764 (24.11) | 276 (41.32) | 158740 (25.14) | 1116 (40.58) |
| 40-49                       | 9255 (1.61)    | 10 (1.50)   | 12583 (1.99)   | 130 (4.73)   |
| 50+                         | 24 (0.00)      | 0 (0.00)    | 35 (0.01)      | 5 (0.18)     |
| Missing                     | 214999 (37.36) | 4 (0.60)    | 273368 (43.30) | 8 (0.29)     |

Spread of values amongst matching variables used in the linkage exercises performed between EPICure and Hospital Episode Statistics (HES) data for 1995 and 2006. (EPICure n = 668 (March – December); EPICure 2 n = 2,750; HES (1995) = 575,509 for the entire year; HES (2006) n = 631,401.)

Table S2: Birth weight v gestational age in HES 2006 data

| Birth weight category | Gestational age (weeks) |               |               |               |                |                |                |                |                 |                 |                    |                    | Missing            | Total              |
|-----------------------|-------------------------|---------------|---------------|---------------|----------------|----------------|----------------|----------------|-----------------|-----------------|--------------------|--------------------|--------------------|--------------------|
|                       | > 20                    | 20            | 21            | 22            | 23             | 24             | 25             | 26             | 27-29           | 30-34           | 35-39              | 40+                |                    |                    |
| >500                  | 16<br>(0.003)           | 17<br>(0.003) | 28<br>(0.004) | 28<br>(0.004) | 21<br>(0.003)  | 35<br>(0.006)  | 25<br>(0.004)  | 15<br>(0.002)  | 28<br>(0.004)   | 14<br>(0.002)   | 64<br>(0.010)      | 86<br>(0.014)      | 143<br>(0.023)     | 520<br>(0.082)     |
| 500-999               | 10<br>(0.002)           | 1<br>(0.000)  | 3<br>(0.000)  | 19<br>(0.003) | 101<br>(0.016) | 218<br>(0.035) | 226<br>(0.036) | 213<br>(0.034) | 345<br>(0.055)  | 86<br>(0.014)   | 11<br>(0.002)      | 9<br>(0.001)       | 662<br>(0.105)     | 1904<br>(0.302)    |
| 1000-1499             | 13<br>(0.002)           | 11<br>(0.002) | 14<br>(0.002) | 4<br>(0.001)  | 5<br>(0.001)   | 6<br>(0.001)   | 14<br>(0.002)  | 41<br>(0.006)  | 685<br>(0.108)  | 934<br>(0.148)  | 92<br>(0.015)      | 23<br>(0.004)      | 991<br>(0.157)     | 2833<br>(0.449)    |
| 1500-1999             | 0<br>(0.000)            | 0<br>(0.000)  | 8<br>(0.001)  | 17<br>(0.003) | 22<br>(0.003)  | 13<br>(0.002)  | 31<br>(0.005)  | 4<br>(0.001)   | 86<br>(0.014)   | 2355<br>(0.373) | 1231<br>(0.195)    | 70<br>(0.011)      | 2076<br>(0.329)    | 5913<br>(0.936)    |
| 2000-2499             | 1<br>(0.000)            | 0<br>(0.000)  | 1<br>(0.000)  | 4<br>(0.001)  | 15<br>(0.002)  | 37<br>(0.006)  | 89<br>(0.014)  | 64<br>(0.010)  | 82<br>(0.013)   | 2038<br>(0.323) | 8289<br>(1.313)    | 1015<br>(0.161)    | 5842<br>(0.925)    | 17477<br>(2.768)   |
| 2500-2999             | 1<br>(0.000)            | 2<br>(0.000)  | 1<br>(0.000)  | 0<br>(0.000)  | 6<br>(0.001)   | 13<br>(0.002)  | 137<br>(0.022) | 216<br>(0.034) | 667<br>(0.106)  | 568<br>(0.090)  | 27750<br>(4.395)   | 11464<br>(1.816)   | 19081<br>(3.022)   | 59906<br>(9.488)   |
| 3000-3499             | 3<br>(0.000)            | 2<br>(0.000)  | 2<br>(0.000)  | 0<br>(0.000)  | 3<br>(0.000)   | 6<br>(0.001)   | 78<br>(0.012)  | 222<br>(0.035) | 1580<br>(0.250) | 152<br>(0.024)  | 38932<br>(6.166)   | 41831<br>(6.625)   | 38888<br>(6.159)   | 121699<br>(19.274) |
| 3500-3999             | 1<br>(0.000)            | 0<br>(0.000)  | 0<br>(0.000)  | 0<br>(0.000)  | 0<br>(0.000)   | 1<br>(0.000)   | 14<br>(0.002)  | 87<br>(0.014)  | 1261<br>(0.200) | 61<br>(0.010)   | 20293<br>(3.214)   | 43579<br>(6.902)   | 30905<br>(4.895)   | 96202<br>(15.236)  |
| 4000-4499             | 4<br>(0.001)            | 0<br>(0.000)  | 0<br>(0.000)  | 1<br>(0.000)  | 0<br>(0.000)   | 1<br>(0.000)   | 7<br>(0.001)   | 23<br>(0.004)  | 405<br>(0.064)  | 10<br>(0.002)   | 4516<br>(0.715)    | 16275<br>(2.578)   | 10172<br>(1.611)   | 31414<br>(4.975)   |
| 4500-4999             | 2<br>(0.000)            | 0<br>(0.000)  | 0<br>(0.000)  | 0<br>(0.000)  | 0<br>(0.000)   | 0<br>(0.000)   | 1<br>(0.000)   | 0<br>(0.000)   | 60<br>(0.010)   | 1<br>(0.000)    | 630<br>(0.100)     | 2684<br>(0.425)    | 1566<br>(0.248)    | 4944<br>(0.783)    |
| 5000+                 | 12<br>(0.002)           | 1<br>(0.000)  | 0<br>(0.000)  | 0<br>(0.000)  | 0<br>(0.000)   | 2<br>(0.000)   | 0<br>(0.000)   | 1<br>(0.000)   | 3<br>(0.000)    | 4<br>(0.001)    | 96<br>(0.015)      | 292<br>(0.046)     | 211<br>(0.033)     | 622<br>(0.099)     |
| Missing               | 32<br>(0.005)           | 2<br>(0.000)  | 9<br>(0.001)  | 14<br>(0.002) | 39<br>(0.006)  | 52<br>(0.008)  | 60<br>(0.010)  | 87<br>(0.014)  | 271<br>(0.043)  | 1590<br>(0.252) | 27390<br>(4.338)   | 32842<br>(5.201)   | 225579<br>(35.727) | 287967<br>(45.608) |
| Total                 | 95<br>(0.015)           | 36<br>(0.006) | 66<br>(0.010) | 87<br>(0.014) | 212<br>(0.034) | 384<br>(0.061) | 682<br>(0.108) | 973<br>(0.154) | 5473<br>(0.867) | 7813<br>(1.237) | 129294<br>(20.477) | 150170<br>(23.784) | 336116<br>(53.233) | (100.000)          |

Numbers of subjects (percentage of overall data set) according to birth weight (g) by gestational age (weeks), as recorded in the 2006 Hospital Episode Statistics data set.

1  
2  
3  
4  
5  
6  
7  
8  
9  
10  
11  
12  
13  
14  
15  
16  
17  
18  
19  
20  
21  
22  
23  
24  
25  
26  
27  
28  
29  
30  
31  
32  
33

1  
2  
3  
4  
5  
6  
7  
8  
9  
10  
11  
12  
13  
14  
15  
16  
17  
18  
19  
20  
21  
22  
23  
24  
25  
26  
27  
28  
29  
30  
31  
32  
33

Table S3: Number of pairs matched using guestimate probabilities (2006)

| Cut off weight | N pairs | N EPICure | % EPICure | N HES | % HES |
|----------------|---------|-----------|-----------|-------|-------|
| 10             | 44719   | 2729      | 99.24     | 36025 | 5.71  |
| 11             | 40363   | 2701      | 98.22     | 34741 | 5.50  |
| 12             | 2459    | 1569      | 57.05     | 1811  | 0.29  |
| 13             | 2445    | 1567      | 56.98     | 1806  | 0.29  |
| 16             | 2130    | 1455      | 52.91     | 1608  | 0.25  |
| 17             | 2082    | 1435      | 52.18     | 1576  | 0.25  |
| 19             | 2072    | 1430      | 52.00     | 1572  | 0.25  |
| 20             | 2004    | 1394      | 50.69     | 1526  | 0.24  |
| 21             | 1969    | 1385      | 50.36     | 1517  | 0.24  |
| 22             | 1895    | 1362      | 49.53     | 1489  | 0.24  |
| 23             | 1886    | 1360      | 49.45     | 1488  | 0.24  |
| 24             | 1515    | 1128      | 41.02     | 1189  | 0.19  |
| 26             | 1499    | 1121      | 40.76     | 1181  | 0.19  |
| 27             | 1475    | 1119      | 40.69     | 1179  | 0.19  |
| 28             | 1474    | 1118      | 40.65     | 1178  | 0.19  |
| 29             | 1460    | 1108      | 40.29     | 1168  | 0.18  |
| 30             | 1411    | 1086      | 39.49     | 1149  | 0.18  |
| 31             | 1168    | 917       | 33.35     | 970   | 0.15  |
| 32             | 1165    | 915       | 33.27     | 968   | 0.15  |
| 33             | 1127    | 889       | 32.33     | 934   | 0.15  |
| 34             | 994     | 788       | 28.65     | 836   | 0.13  |
| 35             | 972     | 777       | 28.25     | 828   | 0.13  |
| 36             | 970     | 775       | 28.18     | 826   | 0.13  |
| 37             | 726     | 578       | 21.02     | 614   | 0.10  |
| 38             | 724     | 576       | 20.95     | 612   | 0.10  |
| 39             | 710     | 565       | 20.55     | 601   | 0.10  |
| 41             | 675     | 539       | 19.60     | 571   | 0.09  |
| 42             | 559     | 446       | 16.22     | 476   | 0.08  |
| 43             | 494     | 430       | 15.64     | 461   | 0.07  |
| 44             | 266     | 233       | 8.47      | 259   | 0.04  |
| 45             | 265     | 233       | 8.47      | 258   | 0.04  |
| 46             | 249     | 218       | 7.93      | 242   | 0.04  |
| 53             | 126     | 117       | 4.25      | 122   | 0.02  |
| 54             | 102     | 93        | 3.38      | 98    | 0.02  |
| 55             | 0       | 0         | 0.00      | 0     | 0.00  |

<sup>24</sup>Table of the number of pairs matched in 2006 from each data set for differing cutoffs<sup>24</sup>  
<sup>25</sup>in the value of the weight calculated by the Fellegi-Sunter (guestimate) method of <sup>25</sup>  
<sup>26</sup>data linkage.

Table S4: Number of pairs matched using Dattani estimates (1995)

| Cut off weight | N pairs | N EPICure | % EPICure | N HES | % HES |
|----------------|---------|-----------|-----------|-------|-------|
| 35             | 29453   | 453       | 67.81     | 16385 | 3.37  |
| 36             | 3674    | 409       | 61.23     | 3540  | 0.73  |
| 37             | 3649    | 400       | 59.88     | 3518  | 0.72  |
| 38             | 1064    | 299       | 44.76     | 1049  | 0.22  |
| 39             | 1044    | 290       | 43.41     | 1029  | 0.21  |
| 40             | 920     | 277       | 41.47     | 915   | 0.19  |
| 41             | 905     | 270       | 40.42     | 900   | 0.18  |
| 42             | 313     | 198       | 29.64     | 311   | 0.06  |
| 43             | 254     | 169       | 25.30     | 252   | 0.05  |
| 44             | 240     | 160       | 23.95     | 240   | 0.05  |
| 45             | 205     | 147       | 22.01     | 205   | 0.04  |
| 46             | 87      | 85        | 12.72     | 87    | 0.02  |
| 47             | 85      | 83        | 12.43     | 85    | 0.02  |
| 48             | 80      | 78        | 11.68     | 80    | 0.02  |
| 49             | 69      | 69        | 10.33     | 69    | 0.01  |
| 50             | 51      | 51        | 7.63      | 51    | 0.01  |
| 51             | 49      | 49        | 7.34      | 49    | 0.01  |
| 52             | 40      | 40        | 5.99      | 40    | 0.01  |
| 53             | 38      | 38        | 5.69      | 38    | 0.01  |
| 54             | 33      | 33        | 4.94      | 33    | 0.01  |
| 55             | 29      | 29        | 4.34      | 29    | 0.01  |
| 56             | 29      | 29        | 4.34      | 29    | 0.01  |
| 57             | 27      | 27        | 4.04      | 27    | 0.01  |
| 58             | 18      | 18        | 2.69      | 18    | 0     |
| 59             | 13      | 13        | 1.95      | 13    | 0     |
| 61             | 13      | 13        | 1.95      | 13    | 0     |
| 62             | 5       | 5         | 0.75      | 5     | 0     |
| 63             | 3       | 3         | 0.45      | 3     | 0     |
| 65             | 3       | 3         | 0.45      | 3     | 0     |
| 66             | 0       | 0         | 0         | 0     | 0     |

Table of the number of pairs matched in 1995 from each data set for differing cutoffs<sup>24</sup> in the value of the weight calculated by the Fellegi-Sunter method of data linkage<sup>24</sup> using estimates based on Dattani et al.<sup>[1]</sup>

Table S5: Number of pairs matched using Dattani estimates (2006)

| Cut off weight | N pairs | N EPICure | % EPICure | N HES | % HES |
|----------------|---------|-----------|-----------|-------|-------|
| 15             | 53413   | 2709      | 98.51     | 40104 | 6.35  |
| 16             | 38608   | 2672      | 97.16     | 32232 | 5.10  |
| 17             | 38020   | 2662      | 96.80     | 32114 | 5.09  |
| 18             | 37857   | 2658      | 96.65     | 32051 | 5.08  |
| 19             | 4497    | 1897      | 68.98     | 3129  | 0.50  |
| 20             | 4397    | 1885      | 68.55     | 3078  | 0.49  |
| 21             | 3614    | 1741      | 63.31     | 2489  | 0.39  |
| 22             | 3605    | 1741      | 63.31     | 2489  | 0.39  |
| 23             | 3582    | 1736      | 63.13     | 2469  | 0.39  |
| 24             | 2362    | 1512      | 54.98     | 1814  | 0.29  |
| 25             | 2358    | 1511      | 54.95     | 1812  | 0.29  |
| 26             | 2279    | 1488      | 54.11     | 1776  | 0.28  |
| 27             | 2200    | 1449      | 52.69     | 1717  | 0.27  |
| 28             | 2172    | 1432      | 52.07     | 1701  | 0.27  |
| 29             | 2159    | 1431      | 52.04     | 1700  | 0.27  |
| 30             | 1440    | 1089      | 39.60     | 1144  | 0.18  |
| 31             | 1439    | 1089      | 39.60     | 1144  | 0.18  |
| 32             | 1427    | 1082      | 39.35     | 1137  | 0.18  |
| 33             | 1404    | 1073      | 39.02     | 1129  | 0.18  |
| 34             | 1169    | 923       | 33.56     | 980   | 0.16  |
| 35             | 1162    | 920       | 33.45     | 974   | 0.15  |
| 36             | 1118    | 899       | 32.69     | 933   | 0.15  |
| 37             | 1116    | 899       | 32.69     | 933   | 0.15  |
| 38             | 930     | 748       | 27.20     | 781   | 0.12  |
| 39             | 821     | 661       | 24.04     | 692   | 0.11  |
| 40             | 817     | 658       | 23.93     | 690   | 0.11  |
| 41             | 772     | 624       | 22.69     | 653   | 0.10  |
| 42             | 540     | 457       | 16.62     | 488   | 0.08  |
| 43             | 431     | 368       | 13.38     | 398   | 0.06  |
| 44             | 431     | 368       | 13.38     | 398   | 0.06  |
| 45             | 385     | 338       | 12.29     | 362   | 0.06  |
| 46             | 300     | 253       | 9.20      | 277   | 0.04  |
| 47             | 300     | 253       | 9.20      | 277   | 0.04  |
| 48             | 278     | 231       | 8.40      | 255   | 0.04  |
| 49             | 242     | 206       | 7.49      | 224   | 0.04  |
| 50             | 242     | 206       | 7.49      | 224   | 0.04  |
| 51             | 141     | 114       | 4.15      | 127   | 0.02  |
| 52             | 83      | 70        | 2.55      | 75    | 0.01  |
| 53             | 38      | 37        | 1.35      | 38    | 0.01  |
| 56             | 38      | 37        | 1.35      | 38    | 0.01  |
| 57             | 26      | 26        | 0.95      | 26    | 0     |
| 60             | 26      | 26        | 0.95      | 26    | 0     |
| 61             | 2       | 2         | 0.07      | 2     | 0     |
| 63             | 2       | 2         | 0.07      | 2     | 0     |
| 64             | 0       | 0         | 0         | 0     | 0     |

Table of the number of pairs matched in 2006 from each data set for differing cutoffs in the value of the weight calculated by the Fellegi-Sunter method of data linkage using estimates based on Dattani et al.[1]

Table S6: Number of pairs matched using the EpiLink algorithm (2006)

| Cut off weight | N pairs | N EPICure | % EPICure | N HES | % HES |
|----------------|---------|-----------|-----------|-------|-------|
| 0.35           | 6323    | 2162      | 78.62     | 5608  | 0.89  |
| 0.40           | 2746    | 1542      | 56.07     | 2405  | 0.38  |
| 0.45           | 1573    | 1225      | 44.55     | 1328  | 0.21  |
| 0.50           | 1413    | 1135      | 41.27     | 1198  | 0.19  |
| 0.55           | 1180    | 965       | 35.09     | 1018  | 0.16  |
| 0.60           | 1125    | 922       | 33.53     | 975   | 0.15  |
| 0.65           | 928     | 774       | 28.15     | 805   | 0.13  |
| 0.70           | 623     | 514       | 18.69     | 545   | 0.09  |
| 0.75           | 538     | 447       | 16.25     | 478   | 0.08  |
| 0.80           | 264     | 237       | 8.62      | 264   | 0.04  |
| 0.85           | 137     | 129       | 4.69      | 137   | 0.02  |
| 0.90           | 122     | 116       | 4.22      | 122   | 0.02  |
| 0.95           | 0       | 0         | 0.00      | 0     | 0.00  |

Table of the number of pairs matched in 2006 from each data set for differing cutoffs in the value of the weight calculated by the EpiLink (Contiero) method of data linkage.

1  
2  
3  
4  
5  
6  
7  
8  
9

10 Table S7: Number of pairs matched using the estimation-maximisation algorithm  
(1995)

|    | Cut off weight | N pairs | N EPICure | % EPICure | N HES | % HES |
|----|----------------|---------|-----------|-----------|-------|-------|
| 11 |                |         |           |           |       |       |
| 12 | 25             | 644     | 232       | 34.73     | 502   | 0.10  |
|    | 26             | 541     | 212       | 31.74     | 421   | 0.09  |
|    | 27             | 429     | 189       | 28.29     | 348   | 0.07  |
| 13 | 28             | 294     | 175       | 26.20     | 241   | 0.05  |
|    | 29             | 231     | 155       | 23.20     | 201   | 0.04  |
|    | 30             | 177     | 139       | 20.81     | 161   | 0.03  |
| 14 | 31             | 153     | 132       | 19.76     | 147   | 0.03  |
|    | 32             | 140     | 123       | 18.41     | 135   | 0.03  |
| 15 | 33             | 136     | 120       | 17.96     | 132   | 0.03  |
|    | 34             | 134     | 118       | 17.66     | 130   | 0.03  |
| 16 | 35             | 129     | 114       | 17.07     | 125   | 0.03  |
|    | 36             | 121     | 108       | 16.17     | 117   | 0.02  |
| 17 | 37             | 114     | 101       | 15.12     | 110   | 0.02  |
|    | 38             | 107     | 96        | 14.37     | 103   | 0.02  |
|    | 39             | 99      | 90        | 13.47     | 95    | 0.02  |
| 18 | 40             | 90      | 82        | 12.28     | 86    | 0.02  |
|    | 41             | 80      | 77        | 11.53     | 79    | 0.02  |
|    | 42             | 74      | 73        | 10.93     | 73    | 0.01  |
| 19 | 43             | 66      | 66        | 9.88      | 66    | 0.01  |
|    | 44             | 61      | 61        | 9.13      | 61    | 0.01  |
| 20 | 45             | 58      | 58        | 8.68      | 58    | 0.01  |
|    | 46             | 53      | 53        | 7.93      | 53    | 0.01  |
| 21 | 47             | 48      | 48        | 7.19      | 48    | 0.01  |
|    | 48             | 43      | 43        | 6.44      | 43    | 0.01  |
|    | 49             | 37      | 37        | 5.54      | 37    | 0.01  |
| 22 | 50             | 34      | 34        | 5.09      | 34    | 0.01  |

23 Table of the number of pairs matched from each data in 1995 set for differing cutoffs  
24 in the value of the weight calculated by the estimation-maximisation method of data  
linkage.

25  
26  
27  
28  
29  
30  
31  
32  
33

†Table S8: Number of pairs matched using the estimation-maximisation algorithm<sup>1</sup>  
<sub>2</sub>(2006)

|    | Cut off weight | N pairs | N EPICure | % EPICure | N HES | % HES |    |
|----|----------------|---------|-----------|-----------|-------|-------|----|
| 3  | 10             | 57519   | 2712      | 98.62     | 37589 | 5.95  | 3  |
| 4  | 11             | 45110   | 2712      | 98.62     | 34287 | 5.43  | 4  |
|    | 12             | 40419   | 2706      | 98.40     | 33051 | 5.23  |    |
| 5  | 13             | 37885   | 2686      | 97.67     | 32260 | 5.11  | 5  |
| 6  | 14             | 35164   | 2683      | 97.56     | 30017 | 4.75  | 6  |
|    | 15             | 33606   | 2678      | 97.38     | 28588 | 4.53  |    |
| 7  | 16             | 33570   | 2677      | 97.35     | 28558 | 4.52  | 7  |
|    | 17             | 33554   | 2677      | 97.35     | 28542 | 4.52  |    |
| 8  | 18             | 33540   | 2677      | 97.35     | 28529 | 4.52  | 8  |
|    | 19             | 33391   | 2677      | 97.35     | 28428 | 4.50  |    |
| 9  | 20             | 31450   | 2644      | 96.15     | 27453 | 4.35  | 9  |
|    | 21             | 22960   | 2483      | 90.29     | 20527 | 3.25  |    |
| 10 | 22             | 1981    | 1362      | 49.53     | 1645  | 0.26  | 10 |
|    | 23             | 1766    | 1265      | 46.00     | 1450  | 0.23  |    |
| 11 | 24             | 1687    | 1225      | 44.55     | 1395  | 0.22  | 11 |
|    | 25             | 1473    | 1113      | 40.47     | 1219  | 0.19  |    |
| 12 | 26             | 1340    | 1036      | 37.67     | 1106  | 0.18  | 12 |
|    | 27             | 1292    | 1009      | 36.69     | 1071  | 0.17  |    |
| 13 | 28             | 1247    | 980       | 35.64     | 1036  | 0.16  | 13 |
|    | 29             | 1201    | 939       | 34.15     | 993   | 0.16  |    |
| 14 | 30             | 1113    | 871       | 31.67     | 927   | 0.15  | 14 |
|    | 31             | 1056    | 835       | 30.36     | 883   | 0.14  |    |
| 15 | 32             | 999     | 799       | 29.05     | 845   | 0.13  | 15 |
|    | 33             | 953     | 771       | 28.04     | 816   | 0.13  |    |
| 16 | 34             | 902     | 729       | 26.51     | 776   | 0.12  | 16 |
|    | 35             | 856     | 686       | 24.95     | 734   | 0.12  |    |
| 17 | 36             | 806     | 645       | 23.45     | 695   | 0.11  | 17 |
|    | 37             | 747     | 599       | 21.78     | 647   | 0.10  |    |
| 18 | 38             | 685     | 550       | 20.00     | 597   | 0.09  | 18 |
|    | 39             | 638     | 513       | 18.65     | 553   | 0.09  |    |
| 19 | 40             | 555     | 449       | 16.33     | 483   | 0.08  | 19 |
|    | 41             | 499     | 408       | 14.84     | 438   | 0.07  |    |
| 20 | 42             | 455     | 374       | 13.60     | 400   | 0.06  | 20 |
|    | 43             | 414     | 339       | 12.33     | 359   | 0.06  |    |
| 21 | 44             | 400     | 325       | 11.82     | 345   | 0.05  | 21 |
|    | 45             | 388     | 315       | 11.45     | 336   | 0.05  |    |
| 22 | 46             | 382     | 310       | 11.27     | 330   | 0.05  | 22 |
|    | 47             | 356     | 289       | 10.51     | 307   | 0.05  |    |
| 23 | 48             | 335     | 277       | 10.07     | 296   | 0.05  | 23 |
|    | 49             | 304     | 259       | 9.42      | 279   | 0.04  |    |
| 24 | 50             | 277     | 239       | 8.69      | 259   | 0.04  | 24 |
|    | 51             | 232     | 207       | 7.53      | 225   | 0.04  |    |
| 25 | 52             | 206     | 184       | 6.69      | 202   | 0.03  | 25 |
|    | 53             | 173     | 155       | 5.64      | 172   | 0.03  |    |
| 26 | 54             | 137     | 131       | 4.76      | 137   | 0.02  | 26 |
|    | 55             | 117     | 113       | 4.11      | 117   | 0.02  |    |
| 27 | 56             | 100     | 96        | 3.49      | 100   | 0.02  | 27 |
|    | 57             | 89      | 85        | 3.09      | 89    | 0.01  |    |
| 28 | 58             | 77      | 73        | 2.65      | 77    | 0.01  | 28 |
|    | 59             | 70      | 66        | 2.40      | 70    | 0.01  |    |
| 29 | 60             | 65      | 61        | 2.22      | 65    | 0.01  | 29 |

Continued on next page...



**Table S8:** Number of pairs at different cut-offs obtained from the estimation-maximisation algorithm in 2006 (Continued).

| Cut off weight | N pairs | N EPICure | % EPICure | N HES | % HES |
|----------------|---------|-----------|-----------|-------|-------|
| 61             | 61      | 57        | 2.07      | 61    | 0.01  |
| 62             | 58      | 54        | 1.96      | 58    | 0.01  |
| 63             | 56      | 52        | 1.89      | 56    | 0.01  |
| 64             | 48      | 45        | 1.64      | 48    | 0.01  |
| 65             | 41      | 38        | 1.38      | 41    | 0.01  |
| 66             | 36      | 33        | 1.20      | 36    | 0.01  |
| 67             | 27      | 25        | 0.91      | 27    | 0.00  |
| 68             | 15      | 14        | 0.51      | 15    | 0.00  |
| 69             | 9       | 8         | 0.29      | 9     | 0.00  |
| 70             | 2       | 2         | 0.07      | 2     | 0.00  |

Table of the number of pairs matched from each data set in 2006 for differing cutoffs in the value of the weight calculated by the estimation-maximisation method of data linkage.

#### Author details

<sup>1</sup>Institute for Womens' Health, UCL, 74 Huntley Street, London, UK. <sup>2</sup> Homerton Hospital, London, UK. <sup>3</sup> University of Leicester, Leicester, UK.

#### References

- Dattani, N., Datta-Nemdharry, P., Macfarlane, A.: Linking maternity data for England, 2005-06: methods and data quality. *Health Statistics Quarterly / Office for National Statistics* **49**(1), 53–79 (2011). doi:[10.1057/hsq.2011.3](https://doi.org/10.1057/hsq.2011.3)
